# Supplementary material for: Chronic cocaine-regulated epigenomic changes in mouse nucleus accumbens
Source: PubMed Central journal article supplement (PMC4073058; doi:10.1186/gb-2014-15-4-r65), 2014-04-22

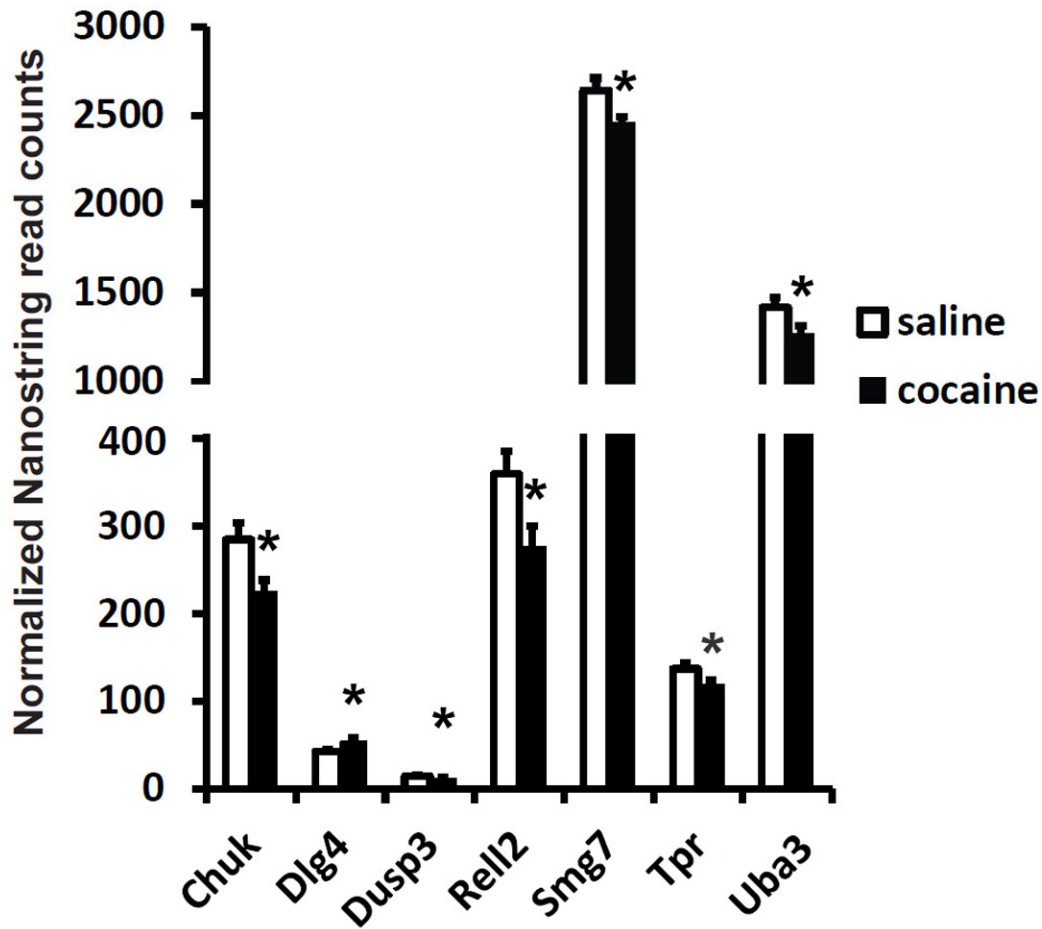

Supplement: gb-2014-15-4-r65-S5.pdf [file gb-2014-15-4-r65-S5.pdf]
