# Supplementary material for: Chronic cocaine-regulated epigenomic changes in mouse nucleus accumbens
Source: PubMed Central journal article supplement (PMC4073058; doi:10.1186/gb-2014-15-4-r65), 2014-04-22
Supplement: gb-2014-15-4-r65-S25.pdf [file gb-2014-15-4-r65-S25.pdf]

Table S12, Quality Control of RNA-Seq Data.

|                    | Gene Symbol | S1    | S2    | S3    | Mean acute | S1    | S2    | S3    | Mean chronic | Notes <sup>1</sup>                                                        |
|--------------------|-------------|-------|-------|-------|------------|-------|-------|-------|--------------|---------------------------------------------------------------------------|
| MSN-enriched genes | Adcy5       | 140.3 | 155.4 | 140.4 | 145.3      | 179.4 | 181.4 | 168.0 | 176.3        |                                                                           |
|                    | Arpp19      | 238.7 | 287.8 | 273.5 | 266.7      | 269.1 | 301.8 | 240.6 | 270.5        |                                                                           |
|                    | Cartpt      | 30.7  | 29.8  | 25.1  | 28.5       | 35.8  | 29.0  | 46.2  | 37.0         |                                                                           |
|                    | Chrm1       | 19.9  | 20.0  | 20.8  | 20.2       | 24.2  | 25.2  | 23.5  | 24.3         | Higher in olfactory tubercle                                              |
|                    | Gnb5        | 86.8  | 93.4  | 91.5  | 90.6       | 96.0  | 98.1  | 94.4  | 96.2         |                                                                           |
|                    | Gng7        | 290.1 | 339.5 | 296.0 | 308.5      | 367.4 | 366.0 | 368.4 | 367.3        |                                                                           |
|                    | Mchr1       | 18.3  | 20.4  | 17.0  | 18.6       | 19.3  | 18.6  | 20.0  | 19.3         | Higher in dorsal striatum                                                 |
|                    | Npy         | 62.7  | 54.9  | 59.3  | 59.0       | 32.1  | 35.7  | 29.3  | 32.4         |                                                                           |
|                    | Pde10a      | 118.4 | 137.3 | 126.7 | 127.5      | 215.5 | 227.2 | 220.5 | 221.1        |                                                                           |
|                    | Pdyn        | 81.4  | 89.6  | 81.4  | 84.1       | 106.0 | 100.8 | 119.8 | 108.8        |                                                                           |
|                    | Penk        | 738.0 | 876.5 | 794.7 | 803.1      | 738.3 | 781.9 | 744.0 | 754.8        |                                                                           |
|                    | Ppp1r1b     | 592.7 | 635.5 | 555.0 | 594.4      | 552.8 | 590.0 | 535.2 | 559.3        |                                                                           |
|                    | Ptpn5       | 127.3 | 137.2 | 128.5 | 131.0      | 181.0 | 171.8 | 177.3 | 176.7        |                                                                           |
|                    | Rasgrp2     | 75.6  | 85.7  | 87.4  | 82.9       | 102.7 | 106.1 | 102.1 | 103.6        |                                                                           |
|                    | Rgs9        | 117.6 | 127.6 | 119.7 | 121.6      | 160.0 | 161.4 | 167.5 | 162.9        |                                                                           |
|                    | Tac1        | 204.7 | 227.7 | 196.3 | 209.6      | 164.0 | 168.6 | 184.6 | 172.4        |                                                                           |
|                    |             |       |       |       |            |       |       |       |              |                                                                           |
| MSN-depleted genes | Adcy10      | 0.0   | 0.0   | 0.0   | 0.0        | 0.0   | 0.0   | 0.0   | 0.0          | Higher in dorsal striatum and olfactory tubercle                          |
|                    | Bdnf        | 1.2   | 1.0   | 2.2   | 1.5        | 0.3   | 0.5   | 0.3   | 0.4          | Higher in olfactory tubercle                                              |
|                    | Chrm2       | 1.9   | 1.7   | 2.2   | 1.9        | 1.6   | 1.8   | 1.4   | 1.6          | Higher in olfactory tubercle and septum; also expressed in choroid plexus |
|                    | Chrm3       | 3.5   | 2.9   | 4.3   | 3.6        | 1.6   | 2.5   | 1.3   | 1.8          | Higher in olfactory tubercle                                              |
|                    | Chrna2      | 0.1   | 0.1   | 0.1   | 0.1        | 0.1   | 0.1   | 0.1   | 0.1          | Higher in olfactory tubercle and septum                                   |
|                    | Chrna4      | 5.5   | 4.0   | 6.1   | 5.2        | 3.6   | 4.7   | 3.4   | 3.9          | Higher in                                                                 |

|                                            |          |     |     |     |     |     |       |     |      |                              |
|--------------------------------------------|----------|-----|-----|-----|-----|-----|-------|-----|------|------------------------------|
|                                            |          |     |     |     |     |     |       |     |      | lateral cortex               |
|                                            | Chrna7   | 4.3 | 4.0 | 4.5 | 4.3 | 4.6 | 4.7   | 4.3 | 4.5  | Higher in olfactory tubercle |
|                                            | Gfra3    | 0.0 | 0.0 | 0.0 | 0.0 | 0.0 | 0.0   | 0.0 | 0.0  |                              |
|                                            | Hcrt     | 0.0 | 0.0 | 0.0 | 0.0 | 0.1 | 0.0   | 0.1 | 0.1  |                              |
|                                            | Pmch     | 0.1 | 0.1 | 0.0 | 0.1 | 0.1 | 0.1   | 0.0 | 0.1  | Higher in dorsal striatum    |
|                                            | Slc6a3   | 0.2 | 0.1 | 0.2 | 0.2 | 0.1 | 0.1   | 0.1 | 0.1  |                              |
|                                            | Slc6a4   | 0.0 | 0.1 | 0.0 | 0.0 | 0.0 | 0.0   | 0.0 | 0.0  |                              |
|                                            | Th       | 4.2 | 4.4 | 4.3 | 4.3 | 3.8 | 4.3   | 3.8 | 3.9  |                              |
|                                            | Tph1     | 0.0 | 0.1 | 0.0 | 0.1 | 0.0 | 0.0   | 0.0 | 0.0  |                              |
|                                            |          |     |     |     |     |     |       |     |      |                              |
| Choroid plexus-enriched genes <sup>2</sup> | Apoa2    | 0.5 | 0.2 | 0.3 | 0.3 | 0.3 | 0.3   | 0.3 | 0.3  |                              |
|                                            | Aqp1     | 0.1 | 0.1 | 0.1 | 0.1 | 0.1 | 1.0   | 0.1 | 0.4  |                              |
|                                            | Atp4a    | 0.1 | 0.1 | 0.1 | 0.1 | 0.1 | 0.0   | 0.1 | 0.1  |                              |
|                                            | Folr1    | 0.1 | 0.1 | 0.1 | 0.1 | 0.1 | 2.8   | 0.5 | 1.1  |                              |
|                                            | Hspb1    | 2.1 | 2.9 | 3.2 | 2.7 | 1.0 | 0.9   | 0.9 | 0.9  |                              |
|                                            | Klk4     | 0.0 | 0.0 | 0.0 | 0.0 | 0.0 | 0.0   | 0.0 | 0.0  |                              |
|                                            | Mmp14    | 3.3 | 3.3 | 2.8 | 3.1 | 2.7 | 2.7   | 2.9 | 2.8  |                              |
|                                            | Slc16a12 | 0.4 | 0.4 | 0.4 | 0.4 | 0.4 | 0.5   | 0.4 | 0.5  |                              |
|                                            | Slc19a1  | 5.8 | 5.4 | 5.0 | 5.4 | 6.5 | 6.1   | 5.5 | 6.0  |                              |
|                                            | Slc5a5   | 2.6 | 2.0 | 2.9 | 2.5 | 0.9 | 1.2   | 0.7 | 0.9  |                              |
|                                            | Ttr      | 1.4 | 3.5 | 5.5 | 3.5 | 5.1 | 222.2 | 1.7 | 76.3 |                              |

<sup>1</sup>Genes known to be expressed at higher levels in brain areas in close proximity to NAc.

<sup>2</sup>Only 10 representative genes are shown from the ~100 mouse choroid plexus enriched gene list compared to striatum [76].
